1        **Neural representation of goal direction in the monarch butterfly brain**

2

3        M. Jerome Beetz <sup>1\*</sup>, Christian Kraus<sup>1,2</sup>, Basil el Jundi<sup>1,2</sup>

4

5        **Affiliations**

6        <sup>1</sup>Zoology II, Biocenter, University of Würzburg, Würzburg, Germany

7        <sup>2</sup>Animal Physiology, Department of Biology, Norwegian University of Science and Technology,

8        Trondheim, Norway

9

10       \*Corresponding author

11       M. Jerome Beetz: [jerome.beetz@uni-wuerzburg.de](mailto:jerome.beetz@uni-wuerzburg.de)

12

13

14       Keywords: navigation, orientation, migration, central complex, sun compass

15       Short title: Goal direction coding

16 **ABSTRACT**

17 Neural processing of a navigational goal requires the continuous comparison between the current  
18 heading and the intended goal direction. While the neural basis underlying the current heading is well-  
19 studied in insects, the coding of the goal direction is completely unexplored. Here, we identify for the  
20 first time neurons that encode goal direction in the brain of a navigating insect, the monarch butterfly.  
21 The spatial tuning of these neurons accurately correlates with the animal's goal direction while being  
22 unaffected by compass perturbations. Thus, they specifically encode the goal direction similar to goal  
23 neurons described in the mammalian brain. Taken together, a navigation network based on goal-  
24 direction and heading-direction neurons generates steering commands that efficiently guides the  
25 monarch butterflies to their migratory goal.

26

27

28

29

30

31

32

33

34

35

36

37

38

39

40

## 41 INTRODUCTION

42

43 For goal-directed navigation, animals need to register their current orientation in space, as well as the  
44 direction of their goal. Consequently, their brain constantly compares the current heading direction with  
45 the goal direction (Dacke and el Jundi, 2018; Honkanen et al., 2019). While the former is encoded by  
46 evolutionarily conserved head-direction (HD) neurons found in different species (Beetz et al., 2022;  
47 Ben-Yishay et al., 2021; Geva-Sagiv et al., 2015; Hulse and Jayaraman, 2020; Petrucco et al., 2022;  
48 Seelig and Jayaraman, 2015; Takahashi et al., 2022; Taube et al., 1990; Varga and Ritzmann, 2016;  
49 Vinepinsky et al., 2020), goal-direction (GD) neurons whose action potential rate correlates with the  
50 animal's goal direction have only been reported in the mammalian brain (Sarel et al., 2017). However,  
51 even in the tiny brain of an insect, a robust representation of the goal direction is of the highest ecological  
52 importance. For instance, monarch butterflies are well known for their spectacular southward migration  
53 over ~5,000 km from the Northern US and Canada to their overwintering site in Central Mexico. To  
54 maintain a goal direction during migration, the butterflies use a sun compass for orientation (Mouritsen  
55 and Frost, 2002), which is processed in a brain region termed the central complex (Heinze et al., 2013;  
56 Heinze and Reppert, 2011). Previous studies in a variety of insects have shown that the central complex  
57 houses HD neurons and steering neurons responsible for the animal's steering behavior (Beetz *et al.*,  
58 2022; Martin et al., 2015; Seelig and Jayaraman, 2015; Varga and Ritzmann, 2016). Although a number  
59 of theoretical models predict that the central complex also houses GD neurons (Honkanen *et al.*, 2019;  
60 Matheson et al., 2022; Stone et al., 2017), similar to the ones described in the bat hippocampus (Sarel  
61 *et al.*, 2017), their existence to date has been completely speculative.

62

## 63 RESULTS

64

65 We tethered monarch butterflies at the center of a flight simulator, in which they could freely  
66 steer in any goal direction with respect to a virtual sun (Fig. 1A). Although the tested butterflies were  
67 not in their migratory phase, they reliably maintained consistent goal directions (Fig. 1B; fig. S1). This

68 goal-directed behavior likely emerges by matching the current heading – encoded by the butterflies’  
69 compass – with an internal goal representation. To dissociate between these directional representations,  
70 we perturbed the butterflies’ compass without affecting their goal representation (Fig. 1C). This was  
71 achieved by displacing the sun along the azimuth every 90 s (fig. S2). To maintain the initial goal  
72 direction relative to the sun, the butterflies adjusted their heading direction in accordance with the new  
73 sun position (Fig. 1D). The behavioral response was independent of the size of sun displacement (fig.  
74 S3) and could be reliably evoked in all tested butterflies (Fig. 1E). Taken together we successfully  
75 shifted the polarity of the butterflies’ compass, while the animal’s goal direction remained unaffected.  
76 Thus, HD neurons in the butterfly central complex should change their spatial tuning, following compass  
77 perturbations, while the spatial tuning of GD neurons should remain invariant.

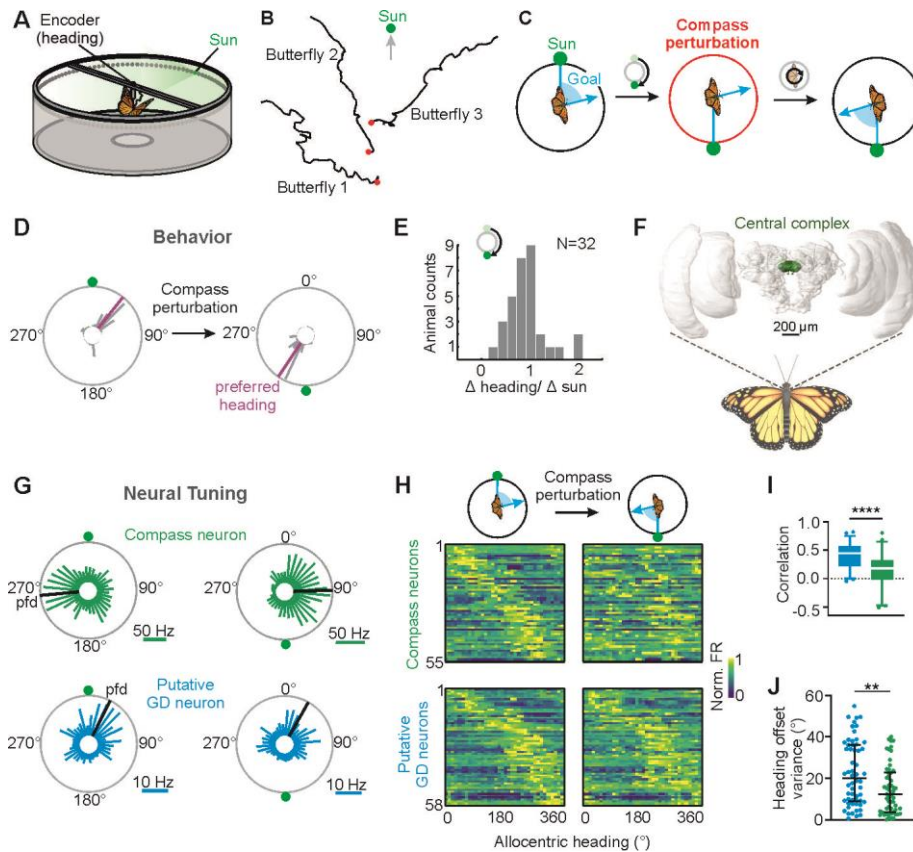

**Fig. 1. Monarch butterflies maintain goal directions relative to a virtual sun.** (A) The arena's inner circumference was equipped with green lights, allowing us to present a virtual sun and change its position. (B) Virtual flight trajectories (8-minute flights) of three tested butterflies. (C) Schematic drawing of the compass perturbation experiment through sun displacements. The compass polarity was manipulated while the butterfly's goal direction remained unaffected (D) Change in heading direction of a butterfly after compass perturbation (180° sun displacement). (E) Butterflies changed their heading in accordance with the change in the position of the virtual sun. (F) Frontal view of the monarch butterfly brain with the central complex highlighted. (G) Tuning of two neurons prior to (left) and after (right) a 180° sun displacement. Black bars indicate the preferred firing directions (*pfds*). (H) Angular tuning of compass and putative goal direction (GD) neurons prior to (left) and after compass perturbation (right). Neurons are ordered according to their *pfds* before compass perturbation. (I) Correlation of the angular tuning prior to and after compass perturbation and (J) heading offsets variances in response to compass perturbations for putative GD (blue,  $n = 58$ ) and compass (green,  $n = 55$ ) neurons. Low heading offset variances indicate that the *pfds* were yoked to the butterfly's heading.

78 While perturbing the butterflies' compass system, we simultaneously monitored the neural  
 79 activity of spatially tuned central-complex neurons (Fig. 1F, fig. S4). With tetrodes implanted in the  
 80 central complex, we recorded from 113 neurons ( $\sim 4.6 \pm 2.2$  neurons/animal) that showed a spatial  
 81 tuning when the butterflies oriented in darkness (fig. S5), an important requirement for an internal  
 82 representation of heading and goal directions (Beetz *et al.*, 2022; Nyberg *et al.*, 2022; Seelig and  
 83 Jayaraman, 2015). As expected for compass neurons, i.e., HD neurons, we found neurons that  
 84 substantially changed their angular tuning following compass perturbations (Fig. 1G, fig S6A). In total,  
 85 55 of 113 neurons (48.7%) modified the direction of their angular tuning, reflected by the preferred  
 86 firing direction (*pfds*), according to the change in the animals' heading (Fig. 1H). Variations in the action  
 87 potential rate during flight could not explain these tuning shifts ( $p = 0.75$ ,  $U = 1540$ ; MWU, fig. S7).

88 Thus, the tuning of these neurons reflects the butterfly compass system, similar to the *Drosophila* HD  
89 neurons (Green et al., 2019). Importantly, the angular tuning of another 58 neurons (51.3%) was  
90 unaffected by compass perturbations (Fig. 1G and 1H, fig S6A-S6C). The correlation between their  
91 angular tuning measured before and after compass perturbations was much higher than in compass  
92 neurons ( $p < 0.001$ ,  $R^2 = 0.18$ , unpaired t-test, Fig. 1I). Moreover, their tuning showed a higher variance  
93 of heading offsets ( $p = 0.005$ ,  $U = 1113$ , MWU, Fig. 1J) indicating that they were *not* linked to the  
94 coding of the butterflies' compass. Given that the animals' goal direction remained consistent  
95 throughout compass perturbations (Fig. 1C), we hypothesized that these neurons encode the butterflies'  
96 internal goal direction.

97 Conversely, the putative GD neurons could encode any stable cue in the environment, e.g.,  
98 magnetic information (Wan et al., 2021). To exclude this possibility and ultimately test for goal coding,  
99 we next reset the butterflies' goal direction – following compass perturbations – by applying small  
100 electric shocks to their necks whenever they headed towards their initial goal direction (Fig. 2A). This  
101 aversive conditioning did indeed reliably change the butterflies' goal direction ( $129.7^\circ \pm 39.9^\circ$ ; Fig. 2B  
102 and 2C; fig. S8A and S8B). Electric stimulation per se did not affect the orientation performance  
103 indicated by similarly high flight precision prior to and after conditioning ( $p = 0.63$ ,  $R^2 = 0.015$ ,  $N = 17$ ,  
104 paired t-test, fig. S9). Potential effects of the electric stimulations on neural tuning were excluded  
105 through control experiments ( $p = 0.63$ ,  $W = 1136$ ,  $n = 256$ , WSRT, fig. S8C). To ensure that we recorded  
106 from the same neurons throughout conditioning, we correlated the spike shapes within the neurons and  
107 across different periods and compared them with spike shapes across different neurons (fig. S10).

108 If GD neurons exist in the insect central complex, we expected that their pfd's should be tightly  
109 linked to butterflies' new goal direction. Remarkably, in addition to compass neurons that did not change  
110 their angular tuning (Fig. 2D), we found neurons whose angular tuning changed in association with the  
111 butterflies' goal directions (Fig. 2E and 2F). The neurons with pfd's yoked to butterfly's flight behavior  
112 observed during aversive conditioning are likely the GD neurons (fig. S11). Similar to GD neurons in  
113 mammals, the neural activity of GD neurons in butterflies should not represent the animals' compass  
114 directions (Sarel *et al.*, 2017). Therefore, we expected that the angular tuning of GD neurons should  
115 only change during aversive conditioning but *not* after compass perturbations (Fig. 3A). Interestingly,

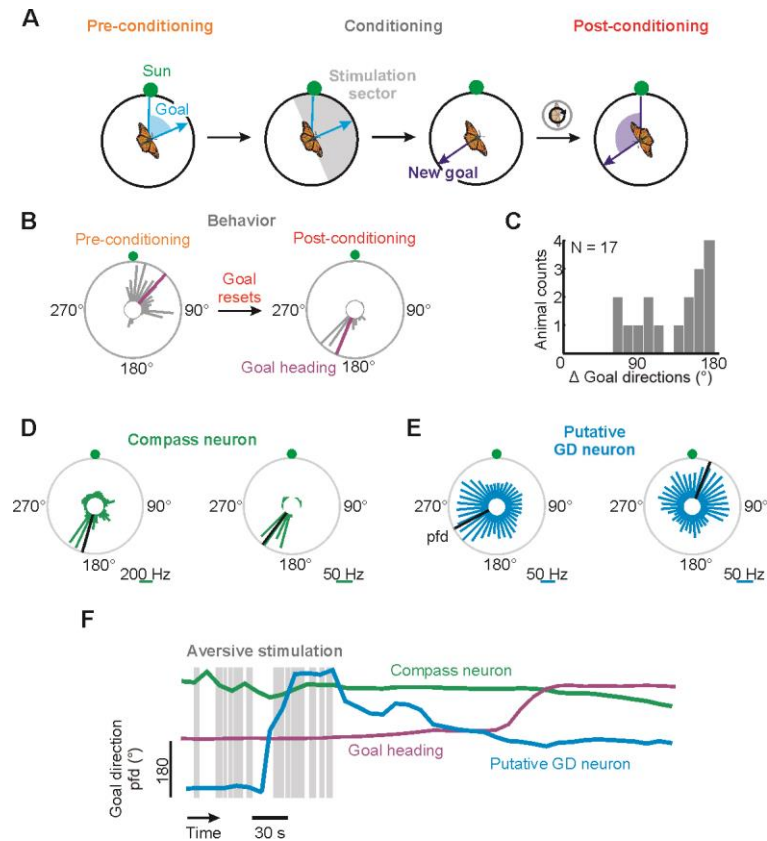

**Fig. 2. Resetting the goal direction.** (A) We reset the goal direction by applying electric shocks to the butterflies' neck whenever they set their initial goal direction ( $\pm 90^\circ$ ; stimulation sector). (B) Circular plots showing the heading before and after conditioning. Magenta lines indicate the Goal heading. (C) Changes in goal directions in 17 animals induced by aversive conditioning. (D, E) Tuning of a compass (D) and a putative goal-direction (E) neuron prior to (*left*) and after (*right*) resetting the goal direction. Black lines indicate the preferred firing directions (*pfds*). (F) Goal heading (magenta line) pfd of a compass (green) and a goal-direction (blue) neuron plotted as a function of time. Gray boxes highlight periods of electric stimulation.

116 20 neurons (31 %) exclusively shifted their pfd during aversive conditioning but showed invariant pfd  
 117 during compass perturbations (Fig. 3B, *upper heatmaps*,  $p = 0.012$ ,  $W = 132$ ,  $n = 20$ , WSRT, Fig. 3C).  
 118 In contrast, the angular tuning of 13 neurons (20 %) changed only when we perturbed the compass (Fig.  
 119 3B, *lower heatmaps*), clearly showing that these are HD neurons. Thus, while the angular tuning of HD  
 120 neurons was specifically modulated during compass perturbations ( $p = 0.01$ ,  $t = 2.72$ , unpaired t-test),  
 121 the pfd of the GD neurons were only affected when the butterflies set a new goal direction (Fig. 3D,  $p$   
 122  $< 10^{-5}$ ,  $t = 5.89$ , unpaired t-test). In addition, the pfd of the GD neurons were tightly linked to the goal  
 123 direction, represented by relatively constant goal offsets ( $p < 10^{-5}$ ,  $U = 60$ ,  $n = 39$  GD & 13 HD neurons,  
 124 MWT; Fig. 3E).



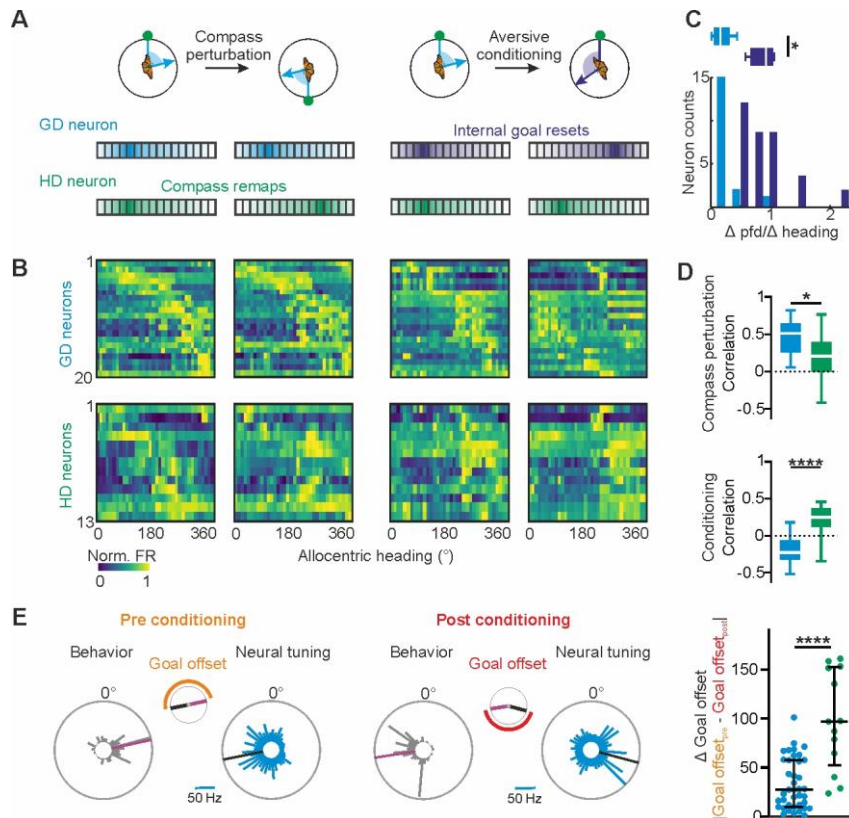

**Fig. 3 Goal coding in monarch butterflies.** (A) Hypothesized neural tuning in response to compass perturbations and aversive conditioning for GD (blue) and HD (green) neurons. (B) Change in angular tuning of GD (upper row) and HD (lower row) neurons in responses to compass perturbations (two left columns) and aversive conditioning (two right columns). Neurons are ordered according to their pfd's before compass perturbation and conditioning. (C) Ratio of changes in preferred firing directions (pfd's) and heading changes for GD neurons during compass perturbations (bright blue data) and during conditioning (dark blue data). X-values close to 0 indicate no correlation between angular tuning and heading. (D) Correlation of angular tuning before and after compass perturbations (top) or conditioning (bottom). (E) Differences in goal offsets prior to (left) and after (right) conditioning in GD (blue) and HD (green) neurons.

125 Central-complex models predict that GD neurons are presynaptic to steering neurons that  
 126 generate pre-motor steering commands. Hence, the tuning of GD and steering neurons should be closely  
 127 associated (Matheson *et al.*, 2022; Wystrach *et al.*, 2020). During our experiments, we recorded from  
 128 19 neurons that showed tuning characteristics expected from steering cells. Their angular tuning was  
 129 tightly linked to the butterflies' change in flight direction during compass perturbation *and* aversive  
 130 conditioning (Fig. 4A and 4B, fig S12). As typical for steering cells (Martin *et al.*, 2015), the neurons  
 131 modulated their firing rate prior to each turn of the animal (Fig. 4C). Interestingly, the GD neurons also  
 132 increased their firing rates prior to flight turns (Fig. 4D). While GD neurons encoded equally strong left  
 133 and right turns, steering neurons typically exhibited a directional selectivity to one rotation direction  
 134 (Fig. 4E). Interestingly, GD neurons monitored simultaneously with steering neurons encoded turns  
 135 even prior to the steering neurons ( $p = 0.005$ ,  $W = -85$ , WSRT, Fig. 4F). This observation fits well with



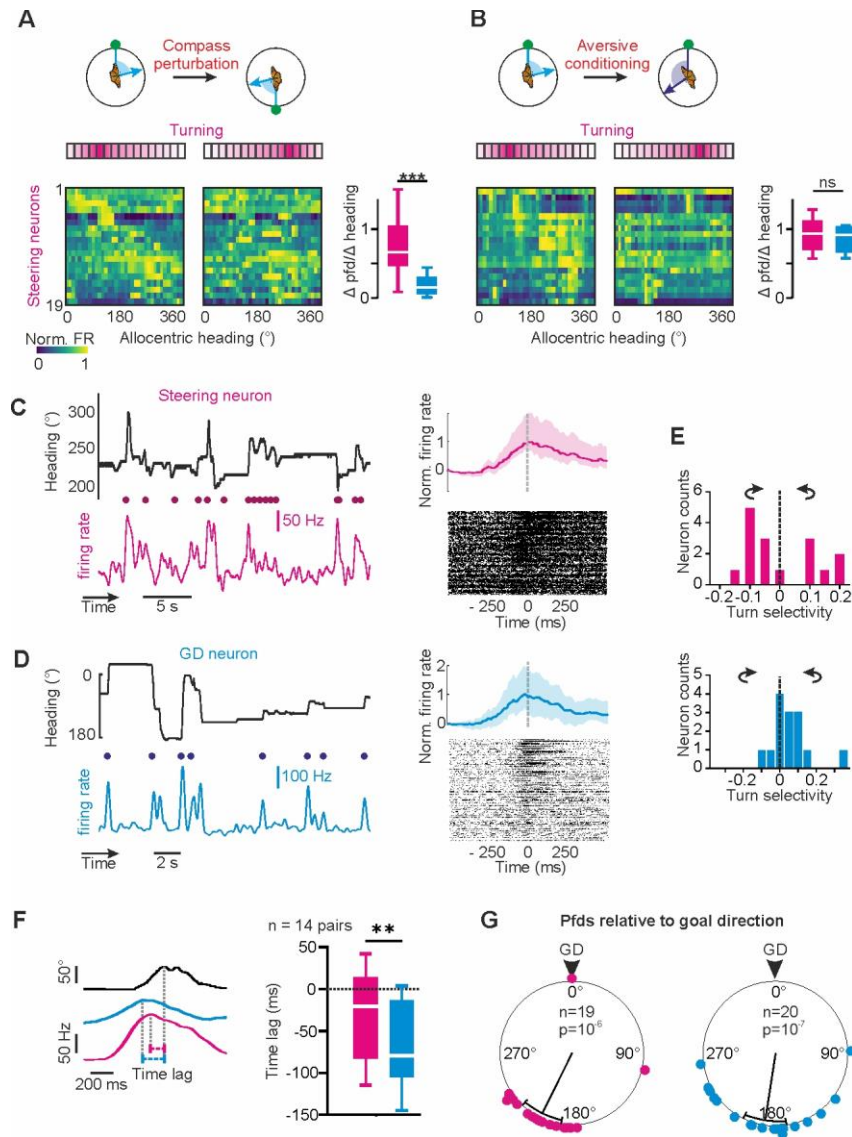

**Fig. 4. Turn coding in GD and steering neurons.** (A, B) Change in angular tuning of steering neurons to compass perturbations (A) and aversive conditioning (B). Neurons were ordered according to their pfd's before compass perturbations and conditioning. Right boxplots show the association between angular tuning and heading before and after compass perturbations (A) and conditioning (B) in steering and GD neurons. (C, D) Left: Example traces comparing heading (top) and neural firing rate (bottom) of a steering (C) and a GD neuron (D). Dots indicate time points of behavioral turns. Right: Sliding averages (top, shaded areas represent percentile) and raster plots (bottom) showing the firing rates of one steering (C) and one GD neuron (D) preceding turns (dashed line, time = 0). (E) Directional selectivity of steering (*top*, N = 16) and GD (*bottom*, N = 14) neurons. (F) Time lags, representing the duration of the neural activity preceding a turn, for pairs of simultaneously recorded GD (blue) and steering (magenta) neurons (dotted line indicates time point of behavioral turns). (G) Pfd's of GD and steering neurons relative to the butterflies' goal direction.

136 the suggested synaptic connection between GD and steering neurons (Matheson *et al.*, 2022; Wystrach  
 137 *et al.*, 2020). In line with this proposition, pfd's of GD ( $p < 0.001$ ;  $V = 0.76$ ;  $n = 20$ ; V-test) and steering  
 138 neurons ( $p < 0.001$ ,  $V = 0.7$ ,  $n = 19$ , V-test) were clustered in the direction opposite to the goal (Fig.  
 139 4G) which contrasts with the uniform distribution of pfd's in HD neurons ( $p = 0.9$ ;  $Z = 0.09$ ;  $n = 13$ ;  
 140 Rayleigh test, fig. S13). Our results therefore suggest that the GD neurons closely interact with steering  
 141 cells and activate them whenever the butterflies substantially deviate from their desired goal direction.  
 142

143 **DISCUSSION**

144

145 We here discovered GD neurons in the insect central complex. The angular tuning of GD  
146 neurons changed when the butterfly's goal direction was reset (Fig. 2). More importantly the change  
147 was tightly associated with the change in goal direction (Fig. 3E). In contrast to this, compass  
148 perturbations did not affect the angular tuning in the very same neurons (Fig. 3). The tight association  
149 between neural tuning and goal-directed behavior *and* the robust selectivity for encoding the goal is  
150 compelling evidence that we have discovered the existence of GD neurons in invertebrates for the first  
151 time.

152 Our tetrode stainings (fig. S4) suggest that the insect GD neurons are localized in the fan-shaped  
153 body of the central complex, which is in line with recent hypotheses (Lu et al., 2022; Matheson *et al.*,  
154 2022; Stone *et al.*, 2017; Wystrach *et al.*, 2020). A network of GD neurons in monarch butterflies could  
155 represent the migratory southward direction as an activity bump across the 16 vertical columns of the  
156 fan-shaped body (Honkanen *et al.*, 2019; Pisokas et al., 2022), similar to what has been demonstrated  
157 for the HD coding in the ellipsoid body (Hulse and Jayaraman, 2020; Seelig and Jayaraman, 2015).  
158 However, in contrast to the HD activity, the GD activity bump might not be yoked to the animal's HD.  
159 Resetting the GD during aversive conditioning might have translocated the GD activity bump and hence  
160 the pfd of single GD neurons. We propose that a similar translocation of the GD activity bump might  
161 transform the butterfly's southward migratory direction into a northward one (Guerra and Reppert,  
162 2013).

163 Taken together, the navigation network of migratory butterflies consists of different neurons  
164 processing the current heading direction *and* goal direction, generating steering commands whenever  
165 the butterfly deviates from its course. In this study, we describe for the first time GD neurons in the  
166 insect brain and functionally discriminate them from HD and steering neurons. Despite being  
167 evolutionarily distant, our results show that the insect central complex houses similar GD neurons as the  
168 ones described in the mammalian brain, highlighting the computational power of the tiny insect brain in  
169 goal-directed navigation.

170

## 171 REFERENCES

- 172 Beetz, M.J., Kraus, C., Franzke, M., Dreyer, D., Strube-Bloss, M.F., Rössler, W., Warrant, E.J., Merlin,  
173 C., and el Jundi, B. (2022). Flight-induced compass representation in the monarch butterfly heading  
174 network. *Curr Biol* 32, 338-+. [10.1016/j.cub.2021.11.009](https://doi.org/10.1016/j.cub.2021.11.009).
- 175 Ben-Yishay, E., Krivoruchko, K., Ron, S., Ulanovsky, N., Derdikman, D., and Gutfreund, Y. (2021).  
176 Directional tuning in the hippocampal formation of birds. *Curr Biol*. [10.1016/j.cub.2021.04.029](https://doi.org/10.1016/j.cub.2021.04.029).
- 177 Dacke, M., and el Jundi, B. (2018). The dung beetle compass. *Curr Biol* 28, R993-R997.  
178 [10.1016/j.cub.2018.04.052](https://doi.org/10.1016/j.cub.2018.04.052).
- 179 Geva-Sagiv, M., Las, L., Yovel, Y., and Ulanovsky, N. (2015). Spatial cognition in bats and rats: from  
180 sensory acquisition to multiscale maps and navigation. *Nat Rev Neurosci* 16, 94-108.  
181 [10.1038/nrn3888](https://doi.org/10.1038/nrn3888).
- 182 Green, J., Vijayan, V., Mussells Pires, P., Adachi, A., and Maimon, G. (2019). A neural heading  
183 estimate is compared with an internal goal to guide oriented navigation. *Nat Neurosci* 22, 1460-1468.  
184 [10.1038/s41593-019-0444-x](https://doi.org/10.1038/s41593-019-0444-x).
- 185 Guerra, P.A., and Reppert, S.M. (2013). Coldness Triggers Northward Flight in Remigrant Monarch  
186 Butterflies. *Current Biology* 23, 419-423. [10.1016/j.cub.2013.01.052](https://doi.org/10.1016/j.cub.2013.01.052).
- 187 Heinze, S., Florman, J., Asokaraj, S., El Jundi, B., and Reppert, S.M. (2013). Anatomical basis of sun  
188 compass navigation II: the neuronal composition of the central complex of the monarch butterfly. *J*  
189 *Comp Neurol* 521, 267-298. [10.1002/cne.23214](https://doi.org/10.1002/cne.23214).
- 190 Heinze, S., and Reppert, S.M. (2011). Sun Compass Integration of Skylight Cues in Migratory Monarch  
191 Butterflies. *Neuron* 69, 345-358. [10.1016/j.neuron.2010.12.025](https://doi.org/10.1016/j.neuron.2010.12.025).
- 192 Honkanen, A., Adden, A., da Silva Freitas, J., and Heinze, S. (2019). The insect central complex and the  
193 neural basis of navigational strategies. *J Exp Biol* 222. [10.1242/jeb.188854](https://doi.org/10.1242/jeb.188854).
- 194 Hulse, B.K., and Jayaraman, V. (2020). Mechanisms Underlying the Neural Computation of Head  
195 Direction. *Annu Rev Neurosci* 43, 31-54. [10.1146/annurev-neuro-072116-031516](https://doi.org/10.1146/annurev-neuro-072116-031516).
- 196 Lu, J., Behbahani, A.H., Hamburg, L., Westeinde, E.A., Dawson, P.M., Lyu, C., Maimon, G., Dickinson,  
197 M.H., Druckmann, S., and Wilson, R.I. (2022). Transforming representations of movement from body-  
198 to world-centric space. *Nature* 601, 98-104. [10.1038/s41586-021-04191-x](https://doi.org/10.1038/s41586-021-04191-x).
- 199 Martin, J.P., Guo, P.Y., Mu, L.Y., Harley, C.M., and Ritzmann, R.E. (2015). Central-Complex Control of  
200 Movement in the Freely Walking Cockroach. *Curr Biol* 25, 2795-2803. [10.1016/j.cub.2015.09.044](https://doi.org/10.1016/j.cub.2015.09.044).
- 201 Matheson, A.M.M., Lanz, A.J., Medina, A.M., Licata, A.M., Currier, T.A., Syed, M.H., and Nagel, K.I.  
202 (2022). A neural circuit for wind-guided olfactory navigation. *Nat Commun* 13, 4613.  
203 [10.1038/s41467-022-32247-7](https://doi.org/10.1038/s41467-022-32247-7).
- 204 Mouritsen, H., and Frost, B.J. (2002). Virtual migration in tethered flying monarch butterflies reveals  
205 their orientation mechanisms. *Proc Natl Acad Sci U S A* 99, 10162-10166. [10.1073/pnas.152137299](https://doi.org/10.1073/pnas.152137299).
- 206 Nyberg, N., Duvelle, E., Barry, C., and Spiers, H.J. (2022). Spatial goal coding in the hippocampal  
207 formation. *Neuron* 110, 394-422. [10.1016/j.neuron.2021.12.012](https://doi.org/10.1016/j.neuron.2021.12.012).
- 208 Petrucco, L., Lavian, H., Wu, Y.K., Svara, F., Štih, V., and Portugues, R. (2022). Neural dynamics and  
209 architecture of the heading direction circuit in a vertebrate brain. *bioRxiv*, 2022.2004.2027.489672.  
210 [10.1101/2022.04.27.489672](https://doi.org/10.1101/2022.04.27.489672).
- 211 Pisokas, I., Rössler, W., Webb, B., Zeil, J., and Narendra, A. (2022). Anesthesia disrupts distance, but  
212 not direction, of path integration memory. *Current Biology* 32, 445-+. [10.1016/j.cub.2021.11.039](https://doi.org/10.1016/j.cub.2021.11.039).
- 213 Sarel, A., Finkelstein, A., Las, L., and Ulanovsky, N. (2017). Vectorial representation of spatial goals in  
214 the hippocampus of bats. *Science* 355, 176-180. [10.1126/science.aak9589](https://doi.org/10.1126/science.aak9589).
- 215 Seelig, J.D., and Jayaraman, V. (2015). Neural dynamics for landmark orientation and angular path  
216 integration. *Nature* 521, 186-+. [10.1038/nature14446](https://doi.org/10.1038/nature14446).
- 217 Stone, T., Webb, B., Adden, A., Ben Weddig, N., Honkanen, A., Templin, R., Wcislo, W., Scimeca, L.,  
218 Warrant, E., and Heinze, S. (2017). An Anatomically Constrained Model for Path Integration in the  
219 Bee Brain. *Curr Biol* 27, 3069-+. [10.1016/j.cub.2017.08.052](https://doi.org/10.1016/j.cub.2017.08.052).
- 220 Takahashi, S., Hombe, T., Matsumoto, S., Ide, K., and Yoda, K. (2022). Head direction cells in a  
221 migratory bird prefer north. *Sci Adv* 8, eabl6848. [10.1126/sciadv.abl6848](https://doi.org/10.1126/sciadv.abl6848).

222 Taube, J.S., Muller, R.U., and Ranck, J.B., Jr. (1990). Head-direction cells recorded from the  
223 postsubiculum in freely moving rats. I. Description and quantitative analysis. *J Neurosci* *10*, 420-435.  
224 Varga, A.G., and Ritzmann, R.E. (2016). Cellular Basis of Head Direction and Contextual Cues in the  
225 Insect Brain. *Curr Biol* *26*, 1816-1828. [10.1016/j.cub.2016.05.037](https://doi.org/10.1016/j.cub.2016.05.037).  
226 Vinepinsky, E., Cohen, L., Perchik, S., Ben-Shahar, O., Donchin, O., and Segev, R. (2020).  
227 Representation of edges, head direction, and swimming kinematics in the brain of freely-navigating  
228 fish. *Sci Rep* *10*, 14762. [10.1038/s41598-020-71217-1](https://doi.org/10.1038/s41598-020-71217-1).  
229 Wan, G., Hayden, A.N., Iiams, S.E., and Merlin, C. (2021). Cryptochrome 1 mediates light-dependent  
230 inclination magnetosensing in monarch butterflies. *Nat Commun* *12*, 771. [10.1038/s41467-021-](https://doi.org/10.1038/s41467-021-21002-z)  
231 [21002-z](https://doi.org/10.1038/s41467-021-21002-z).  
232 Wystrach, A., Le Moël, F., Clement, L., and Schwarz, S. (2020). A lateralised design for the interaction  
233 of visual memories and heading representations in navigating ants. *bioRxiv*, 2020.2008.2013.249193.  
234 [10.1101/2020.08.13.249193](https://doi.org/10.1101/2020.08.13.249193).

235  
236 **Acknowledgments:** We thank Marie Dacke, Lena van Giesen, Eric Warrant, Emily Baird,  
237 Kang Nian Yap, Alice Chou, and Stanley Heinze for their helpful comments on our manuscript.  
238 We thank Martin Strube-Bloss, Keram Pfeiffer, Wolfgang Rößler and Konrad Öchsner for their  
239 technical support. In addition, we thank Sergio Siles ([butterflyfarm.co.cr](http://butterflyfarm.co.cr)) and Marie Gerlinde  
240 Blaese for providing us with monarch butterfly pupae.

241  
242 **Funding:** This work was funded by the Emmy Noether program of the German Research  
243 Foundation granted to BeJ (Grant number: EL784/1-1).

244  
245 **Author contributions:** Conceptualization (MJB, BeJ), Methodology and Formal Analysis  
246 (MJB); Investigation (MJB, CK), Visualization (MJB, CK, BeJ), Funding acquisition (BeJ),  
247 Project administration and Supervision (BeJ), Writing – original draft (MJB, BeJ), Writing –  
248 review & editing (MJB, CK, BeJ).

249  
250 **Competing interests:** Authors declare that they have no competing interests.

251

252 **Data and materials availability:** Matlab files with the calculated response parameters of the

253 neurons together with the Matlab-scripts used for the analysis and Arduino scripts used for

254 stimulus presentation are accessible from Datadryad: tba

255

256 **SUPPLEMENTS**

257

258 **MATERIALS & METHODS**

259 **Animals**

260 Monarch butterflies (*Danaus plexippus*) were ordered as pupae from Costa Rica Entomological  
261 Supply (butterflyfarm.co.cr) and kept in an incubator (HPP 110 and HPP 749, Memmert GmbH + Co.  
262 KG, Schwabach, Germany) at 25°C, 80% relative humidity and 12:12 light/dark-cycle conditions.  
263 After eclosion, the adult butterflies were transferred into another incubator (I-30VL, Percival  
264 Scientific, Perry, IA, USA) at 25°C and 12:12 light/dark condition. Adults had access to 15% sucrose  
265 solution *ad libitum*.

266

267 **Behavioral monitoring**

268 A magnet (diameter = 3 mm; magnetic force = 4 N Supermagnete, Webcraft GmbH, Gottmadingen,  
269 Germany) was dorsally attached with dental wax (Article: 54895 Omnident, Rodgau Nieder-Roden,  
270 Germany) to the thorax of 32 butterflies. A second magnet at the end of a tungsten rod was used to  
271 connect the butterfly dorsally to an optical encoder (E4T miniature Optical Kit Encoder, US Digital,  
272 Vancouver, WA, USA) which measured the animal's heading direction at a sampling rate of 100 Hz and  
273 at an angular resolution of 3°. Encoder signals were digitized (USB4 Encoder Data Acquisition USB  
274 Device, US Digital, Vancouver, WA, USA) and visualized in the US Digital software (USB1, USB4:  
275 US Digital, Vancouver, WA, USA). The optical encoder was vertically attached to a micro linear  
276 actuator (L12-R 50 mm 50:1 6 Volts, Actuonix Motion Devices, Saanichton, BC, Canada) that allowed  
277 us to control the butterfly's suspension height using an Arduino MEGA 2560. The tethered butterfly  
278 could steer along any azimuth while being suspended at the center of a custom-built flight arena. The  
279 arena had an inner diameter of 32 cm and a height of 12 cm, and its upper inner circumference was  
280 equipped with 144 RGB-LEDs (Adafruit NeoPixel, Adafruit Industries, New York, New York, USA).  
281 The LED strip was mounted at an elevation of ~ 30° relative to the butterfly. One of these LEDs provided  
282 a single green light spot that served as a virtual sun stimulus ( $1.74 \times 10^{13}$  photons/cm<sup>2</sup>/s and 1.2° angular



283 extent at the butterfly's eyes, as measured at the center of the arena). The angular position of the virtual  
284 sun was controlled by the Arduino MEGA 2560.

285

## 286 **Neural recordings**

287 For neural recordings, one (N = 9) or three tetrodes (N = 23) were implanted in the butterfly central-  
288 complex. Each tetrode comprised a bundle of four 18 cm long and 12.5  $\mu\text{m}$  thin copper wires (P155,  
289 Elektrisola, Reichshof-Eckenhagen, Germany) that were waxed tightly together. In experiments in  
290 which only one tetrode was implanted, the tetrode consisted of five copper wires (four recording and  
291 one differential wire). Tetrodes were carefully threaded through two Pebax® tubes (each 2-4 cm in  
292 length; 0.026' inner diameter; Zeus Inc, Orangeburg, SC, USA) that served as anchoring points to  
293 reversibly mount the tetrodes to a glass capillary. An additional copper wire served as grounding  
294 electrode and was immersed into the head capsule close to the butterfly's neck. For aversive conditioning  
295 (N = 17), two stimulation copper wires (resistance  $\sim 10\text{ M}\Omega$ ) were waxed to the grounding electrode. All  
296 copper wires were soldered to gold pins and attached to an electrode interface board (EIB-18; Neuralynx  
297 Inc., Bozeman, MT, USA). In experiments in which three tetrodes were used, the tetrodes were fanned  
298 to maximally span 200-250  $\mu\text{m}$  along the horizontal axis. Before each experiment, electrode resistances  
299 were measured with a nanoZ (Multi Channel Systems MCS GmbH, Reutlingen, Germany) and the  
300 electrode tips plated (Elektrolyt Gold solution, Conrad Electronic SE, Hirschau, Germany) to reduce the  
301 resistance of each electrode to  $\sim 0.1\text{-}1\text{ M}\Omega$ . Tetrodes were reused for multiple experiments, after  
302 carefully trimming the tips and replating to the desired resistance.

303 Prior to obtaining neural signals of central-complex neurons, a monarch butterfly was  
304 horizontally restrained on a magnetic holder. To minimize movement artifacts during the recordings,  
305 the head was waxed to the thorax. The head capsule was opened dorsally and fat and trachea covering  
306 the brain surface were removed. To gain access to the central complex, the neural sheath on the dorsal  
307 brain surface was carefully removed using fine tweezers. The electrode bundle containing the grounding  
308 and the stimulation wires were inserted posteriorly in the head capsule, close to the butterfly's neck.  
309 Tetrode tips were immersed in ALEXA 647 fluorophore coupled Hydrazide (A20502 diluted in 0.5 M  
310 KCl, Thermo Fisher Scientific GmbH, Dreieich, Germany) to quantify the tetrode position after each



311 experiment. Recording tetrodes were then inserted into the brain, once per experiment. Tetrodes together  
312 with the glass capillary were attached to an electrode holder (M3301EH; WPI, Sarasota, FL, USA) and  
313 their positions controlled via a micromanipulator (Sensapex, Oulu, Finland). After adjusting the tetrode  
314 position along x- and y-axes, hemolymph fluid covering the brain was temporarily removed and the  
315 tetrodes were carefully moved along the z-axis to reach the central complex. While moving along the z-  
316 axis, band-pass filtered (600-6,000 Hz) neural signals were measured at a sampling frequency of 30  
317 kHz. Neural signals were sent from the EIB-18 via an adapter board (ADPT-DUAL-HS-DRS;  
318 Neuralynx Inc., Bozeman, MT, USA) to a Neuralynx recording system (DL 4SX 32ch System,  
319 Neuralynx Inc., Bozeman, MT, USA). The neural activity was monitored using the software Cheetah  
320 (Neuralynx Inc., Bozeman, MT, USA). For setting a differential configuration, one electrode of the  
321 neighboring tetrode was set as a reference for the recording tetrode in the software. This means that the  
322 neural signals of each tetrode were referenced against the neural signal of an electrode of the neighboring  
323 tetrode. In cases in which only one tetrode was implanted, one of the five copper wires of the recording  
324 tetrode was set as a reference. To find visually sensitive neurons, the virtual sun was occasionally  
325 revolved clockwise and counterclockwise at an angular velocity of 60 deg/s around the insect's head  
326 and the neural responses were visually quantified. After finding visually sensitive neurons at depths  
327 between 150-450  $\mu\text{m}$ , the tetrode and the grounding wire were held in place by adding a two-component  
328 silicone elastomer (Kwik-Sil, WPI, Sarasota, FL, USA). After the Kwik-Sil hardened (~1 hour), the  
329 butterfly was carefully unrestrained and connected via the magnet to the end of the tungsten rod that  
330 was connected to the optical encoder. The tetrodes were carefully removed from the glass capillary and  
331 attached to a Pebax® tube that was orthogonally oriented to the tungsten rod. To avoid wrapping the  
332 tetrode wires around the tungsten rod while the butterflies steered, the animals' angular movements were  
333 restricted to 358°. To synchronize behavioral and neural recordings offline in Spike2 (version 9.0  
334 Cambridge Electronic Devices, Cambridge, UK), a trigger signal was sent from the USB4 encoder via  
335 an ATLAS analog isolator (Neuralynx Inc., Bozeman, MT, USA) and the adapter board to the Neuralynx  
336 recording system at the onset of the behavioral recording. To temporally align stimulus presentations  
337 with the recorded neural activity, an analog output of the Arduino was sent via the ATLAS analog  
338 isolator to the Neuralynx recording system.

339

### 340 **Visualization of electrode tracks**

341 After the neural recordings, the brain was dissected out of the head and fixated overnight in 4%  
342 formaldehyde at 4°C. The brain was then transferred into sodium-phosphate buffer and rinsed for 2 x  
343 20 minutes in 0.1 M phosphate buffered saline (PBS) and 3 x 20 minutes in PBS with 0.3% Triton-X.  
344 The brain was dehydrated with an ascending ethanol series (30% - 100%, 15 minutes each) and  
345 immersed with a 1:1 ethanol-methyl-salicylate solution for 15 minutes, followed by a clearing step in  
346 methyl-salicylate for at least 1 hour. It was then embedded in Permount (Fisher Scientific GmbH,  
347 Schwerte, Germany) between two cover slips and scanned with a confocal microscope (Leica TCS SP2,  
348 Wetzlar, Germany) using a 20x water immersion objective (HC PL APO CS2 20x/0.75 IMM, Leica,  
349 Wetzlar, Germany). To visualize the tetrode position, we reconstructed the tetrode tracks in 3D using  
350 the software Amira 5.3.3 (ThermoFisher, Germany). To compare the tetrode positions from different  
351 experiments, we registered the tetrode position into the monarch butterfly standard central complex  
352 (Heinze *et al.*, 2013). We used an affine (12-degrees of freedom), followed by an elastic registration to  
353 transfer the neuropils of the individual central complexes into the corresponding neuropils of the  
354 standard central complex. The registration and deformation parameters were then applied to the tetrode  
355 reconstruction to visualize the tetrodes in one frame of reference.

356

### 357 **Spike sorting and spike shape analysis**

358 Neural recordings were spike sorted with the tetrode configuration implemented in Spike2 (version 9.00,  
359 Cambridge Electronic Devices, Cambridge, UK). We used four spike detection thresholds (two upper  
360 and two lower thresholds). The highest and lowest thresholds were set to avoid misclassifications of  
361 large voltage deflections occasionally arising from flight movements as spikes. The time window for  
362 template detection was set to 1.6 ms. After spike-sorting, a principal component analysis (PCA) was  
363 used to evaluate and to redefine spike clusters. Spike2 channels were exported as down-sampled Matlab  
364 files (3 kHz) and the remaining analysis was done with custom written scripts in MATLAB (Version  
365 R2021a, MathWorks, Natick, MA, USA). To analyze the spike shapes, the WaveMark channels  
366 containing the spike-waveforms were additionally exported as non-down-sampled Matlab files (30

367 kHz). For each neuron, spike-waveforms averaged from the first half of the experiment (compass  
368 perturbation) were correlated with the averaged spike-waveforms of the second half of the experiment  
369 (aversive conditioning) and statistically compared with the averaged spike-waveforms of the remaining  
370 neurons (Wilcoxon matched-pairs signed rank test: WSRT). This quantification allows us to statistically  
371 test whether neural recordings were stable throughout the experiment and assesses the quality of our  
372 spike-sorting analysis.

373

### 374 **Quantifying behavior and neural tuning**

375 For behavioral analysis, we computed circular histograms by adding each data point of the optical  
376 encoder to the corresponding 10-degree heading bin. The animal's preferred heading, represented by the  
377 mean vector, was computed with the CircStat toolbox for MATLAB. The flight directedness ( $r$ ) was  
378 described with the mean vector strength which ranged between 0 (non-directed) to 1 (highly directed).  
379 Distributions of preferred headings of all animals were tested for uniformity with a Rayleigh test and  
380 visualized in Oriana (Version 4.01, Kovach Computing Services, Anglesey, Wales, UK).

381 Directional coding of neurons was quantified from circular plots. For each neuron and  
382 behavioral condition, i.e., sun position, pre-, post-conditioning, a circular plot was calculated that  
383 reflects the mean firing rate at different heading directions (10-degree bins). Circular statistics were then  
384 computed using the CircStat toolbox for MATLAB or in Oriana (Version 4.01, Kovach Computing  
385 Services, Anglesey, Wales, UK). First, angular sensitivity was determined by testing whether the mean  
386 firing rate deviated from a uniform distribution (Rayleigh test; significance level  $\alpha = 0.05$ ). If this was  
387 the case, we calculated the mean vector, or preferred firing direction (*pdf*), of a neuron.

388

### 389 **Dark experiments**

390 To focus on neurons that showed an internal representation (GD neurons) or are tuned to idiothetic cues,  
391 i.e., in the absence of visual signals (HD neurons), we allowed the butterflies to orient on a Lab Jack  
392 prior to flight (Compact Lab Jack, Inc, Newton, New Jersey, USA). After the butterflies could steer in  
393 the presence of a virtual sun for a couple of minutes, we turned off the virtual sun and measured neural  
394 signals from the butterfly orienting in darkness. 113 out of 147 recorded neurons preserved their angular

395 sensitivity when the butterflies were orienting in darkness and all subsequent neural analysis were based  
396 on these 113 neurons (Rayleigh test: significance level  $\alpha = 0.05$ ).

397

### 398 **Compass perturbation**

399 To perturb the butterfly compass, we performed a similar experiment as the one performed in *Drosophila*  
400 (Green *et al.*, 2019). However, instead of a vertical bar, we used the virtual sun as reference point of the  
401 insect compass. In the presence of the virtual sun, the butterfly flew for 9 min, and we changed the  
402 angular position of the sun every 90 s. In 15 experiments we changed the sun position in decreasing  
403 steps of 180°, 90°, 45°, 23°, and 15°. For the remaining 17 experiments, we exclusively changed the sun  
404 position in relatively large steps of 90° (3 times/experiment) or 180° (2 times/experiment). Preferred  
405 headings were measured every 90 s. Neural data were considered from three periods, in which the  
406 animals showed the highest flight directedness ( $r$ ). Neurons were categorized regarding their changes in  
407 pfd in response to sun displacements. Hereby, we computed the circular variance of the heading offset  
408 ( $CVH$ ) for each neuron. The heading offset represents the angular relation between pfd and behavioral  
409 heading directions. For heading-direction neurons, we suspect constant heading offsets throughout the  
410 experiment, i.e., the neurons' pfd, should covary with the animal's preferred heading. In addition to  
411 heading offset variance, we computed the circular variance of pfd ( $CV$ ). This allowed us to measure  
412 the tuning stability. Both  $CVH$  and  $CV$  were weighted for each neuron by the following equation:

$$413 \quad HI = \frac{(CVH - CV)}{(CVH + CV)}$$

414  $HI > 0$  indicates that neural tuning can better be explained with a correlation to the animal's heading  
415 (putative HD & steering neurons,  $n = 55$ ), while  $HI < 0$  indicate that neural tuning was unaffected by  
416 the animal's heading and the sun's position (putative GD neurons,  $n = 58$ ). In addition, we correlated  
417 the binned neural response (10° bin size) measured prior to sun displacement with the one measured  
418 after displacement.

419

### 420 **Resetting the internal goal direction through aversive conditioning**

421 To reset the butterfly's internal goal direction without perturbing the compass system, we coupled the  
422 initial goal direction ( $\pm 90^\circ$ ) with electric shocks ( $U = 5 \text{ V}$ ;  $I = 0.5 \text{ } \mu\text{A}$ ). Prior to aversive conditioning

423 (pre conditioning), the initial goal direction was visually determined by the experimenter while the  
424 butterfly oriented with respect to a static virtual sun. Depending on the butterfly's flight directedness,  
425 this could take several minutes. To reset the goal direction by a significant amount, the butterfly received  
426 electric shocks whenever it flew in a sector containing the initial goal direction  $\pm 90^\circ$  (aversive  
427 conditioning). Electric shocks were controlled in the US Digital software (USB1, USB4: US Digital,  
428 Vancouver, WA, USA) that sent a signal from one of the USB4 output channels (USB4 Encoder Data  
429 Acquisition USB Device, US Digital, Vancouver, WA, USA) to the stimulus lines at the Neuralynx  
430 adapter board (ADPT-DUAL-HS-DRS; Neuralynx Inc., Bozeman, MT, USA). In parallel, the time  
431 course of stimulation was monitored by sending a digital signal from the USB4 to the Neuralynx system  
432 via the ATLAS analog isolator (Neuralynx Inc., Bozeman, MT, USA). Aversive conditioning took  
433 several minutes, depending on the butterfly's performance. After aversive conditioning (post-  
434 conditioning), the butterfly was allowed to steer freely with respect to the virtual sun for several minutes.  
435 Note that the virtual sun's azimuth was constant throughout the conditioning to avoid any compass  
436 perturbations. Heatmaps comparing the heading direction prior to and after conditioning were computed  
437 by normalizing the circular histograms containing the headings against the maximum bin. To roughly  
438 compare changes of preferred headings (behavior) and pfd (neurons) over time, we moved a sliding  
439 window in 10 s steps from the beginning of the aversive conditioning to the end of the experiment. To  
440 compute a preferred heading/pfd for each time window, it was necessary that the butterfly headed in  
441 each direction. Therefore, time window sizes were relatively large (mean/std: 262/78 s) and were set  
442 from the beginning of pre-conditioning to the time point of the first electric shock. Time courses of pfd  
443 were only used for the purposes of visualization. For quantitative analysis, we compared the angular  
444 tuning measured by circular plots between pre- and post-conditioning. Neurons that were categorized  
445 into putative HD/steering and GD neurons from the sun displacements were further categorized by  
446 calculating a GD index. The GD index is similarly calculated as the HD index, except that the difference  
447 in the goal offset was compared with the difference in pfd across the conditioning experiment. The goal  
448 offset describes the angular relation between the animal's goal direction, i.e., preferred heading, and the  
449 neuron's pfd. If this offset is similar after conditioning, then the neuron encodes the goal direction. In  
450 contrast to GD neurons, HD neurons should not change their angular tuning during conditioning and

451 hence should have invariant pfd's during conditioning. Based on the combination of HD and GD indices,  
452 we categorized four groups of neurons. 1)  $HD > 0$ ;  $GD < 0$ ; Neurons with constant heading offsets but  
453 varying goal offsets as one might predict for HD neurons ( $n = 13$ ). 2)  $HD > 0$ ;  $GD > 0$ ; Neurons with  
454 constant heading and goal offsets receive compass and goal information as one might suspect from  
455 steering neurons ( $n = 19$ ). 3)  $HD < 0$ ;  $GD > 0$ ; Neurons with varying heading offset but constant goal  
456 offset as one might suspect from GD neurons ( $n = 20$ ). 4)  $HD < 0$ ;  $GD < 0$ ; Neurons with invariant pfd's  
457 during sun displacement and conditioning and whose functions cannot be explicitly answered here ( $n =$   
458 13).

459

#### 460 **Electric stimulation experiments in restrained butterflies**

461 In control experiments aiming to test whether electric stimulation affects neural tuning, two stimulation  
462 copper wires (resistance:  $\sim 1 \text{ M}\Omega$ ) were mounted on a single tetrode and inserted into the central complex  
463 of a restrained butterfly. The proximity of stimulation electrodes to the recording site allows one to  
464 undeniably test whether electric stimulation affects neural tuning in the central complex. For visual  
465 stimulation, the virtual sun was revolved clockwise and counterclockwise at an angular velocity of  $60^\circ/\text{s}$   
466 around the butterfly. Electric stimulations were applied as pulses (1 ms) and repeated at 20 and 40 Hz  
467 with an electric current of 0.5-5  $\mu\text{A}$ . Note that we even tested higher currents than the one used for  
468 aversive conditioning. Angular tuning, including pfd's of 256 neurons were compared between pre and  
469 post stimulation (Wilcoxon matched-pairs signed rank test; WSRT).

470

#### 471 **Testing for coding of turning behavior**

472 To test for coding of flight turns, we determined the time points when the animal's heading changed by  
473 more than  $9^\circ$ . We set  $9^\circ$  as turn threshold because the encoder's angular resolution was  $3^\circ$  and deviations  
474 of  $\pm 3^\circ$  could represent variations in flight direction which may not represent substantial flight turns. In  
475 1 s time windows, we examined the firing rate prior to (-500 ms) and after (+ 500 ms) the flight turns.  
476 Sliding averages of the neural activity were generated by applying a low-pass filter to the inter spike-  
477 intervals of the neurons. The neural activity in each time window was normalized to the firing rate 500  
478 ms prior to the turn. Neural activity in time windows in which no flight turn occurred were considered

479 as controls and statistically compared with the neural activity recorded during turns. Neurons were  
480 categorized as coding for flight turns if (i) modulations in the neural activity during flight turns were  
481 higher/lower than the modulations in neural activity during control (Wilcoxon p-test < 0.05) and (ii) if  
482 modulations in the neural activity during flight turns fitted a Gaussian distribution (> 0.7). Time lag  
483 between the peak firing rate and the maximum angular velocity (behavior) were computed by cross  
484 correlating the neural activity with the angular velocity. Negative time lags indicate that the neural  
485 activity changes prior to angular turns and vice versa. Neurons coding for flight turns were tested  
486 whether clockwise or counterclockwise turns elicited responses of different strengths by calculating a  
487 “turn selectivity”. Hereby, the peak firing rate in response to clockwise (CW) and counterclockwise  
488 (CCW) rotations were compared and weighted by the following formula:

$$489 \quad \text{turn selectivity} = \frac{(\text{maxCCW} - \text{maxCW})}{(\text{maxCCW} + \text{maxCW})}$$

490

## 491 **Statistics**

492 Circular statistics were performed in MATLAB and Oriana (Version 4.01, Kovach Computing Services,  
493 Anglesey, Wales, UK). All linear statistics were computed in GraphPad Prism 9 (GraphPad Software,  
494 San Diego, CA, USA). Sample sizes were not statistically pre-determined. Data distributions were tested  
495 for normality with a Shapiro-Wilk test. Normally distributed data were further analyzed with parametric  
496 statistical tests, while non-normally distributed data were tested with non-parametric tests. A Rayleigh  
497 test testing for uniformity of circular data was used to examine whether the flights were biased towards  
498 any direction. To statistically compare the angular tuning measured prior to and after compass  
499 perturbation across compass and putative GD neurons, we compared the correlation values obtained by  
500 correlating the angular tuning prior to sun displacement with the one measured after sun displacement  
501 with an unpaired t-test (Fig. 1I). Heading offsets and circular variances of pfd's were statistically  
502 compared with a Mann-Whitney U test (MWU; Fig. 1J and fig. S6B). Variations in spike rate across  
503 compass and putative GD neurons were compared with a Mann-Whitney U test (Fig. S7). Changes in  
504 goal directions induced by aversive conditioning was statistically tested by comparing the distribution  
505 of GDs before conditioning (pre-conditioning) with the ones after conditioning (post conditioning) using



506 a Mardia-Watson-Wheeler test (MWW) (fig. S8B). Flight directedness prior to and after conditioning  
507 was compared with a paired t-test (fig. S8C). To compare the tuning stability prior to compass  
508 perturbation and aversive conditioning with the one measured after compass perturbation and aversive  
509 conditioning, we statistically compared the correlation values obtained by comparing the angular tunings  
510 with an ordinary one-way ANOVA across different neuron types, i.e., HD, GD, and steering neurons  
511 (fig S12B). Note when comparing between two neuron types, we used a Mann-Whitney U test (Fig.  
512 3D). A Mann-Whitney U test was used to statistically compare the changes in pfd's induced by aversive  
513 conditioning in GD neurons (Fig. 3C) and when comparing pfd changes induced by compass  
514 perturbation and aversive conditioning between GD and steering neurons (Fig. 4A and 4B). Time lags  
515 of turn coding were statistically compared across steering and GD neurons with a Mann-Whitney U test  
516 (Fig. 4F). Hereby, only pairs ( $n = 14$  pairs) of simultaneously recorded steering and GD neurons were  
517 considered because a comparison of time lags across different experiments were unprecise due to the  
518 relatively low sampling rate of the optical encoder. The consistency of goal offsets for putative GD, and  
519 HD neurons across the conditioning was statistically compared with Mann-Whitney U test (Fig. 4E).  
520 Later, the putative GD neurons were divided into GD and steering neurons and their goal offset stability  
521 across conditioning compared with the one of HD neurons (Kruskal-Wallis test; One-Way ANOVA;  
522 Fig. S12C). With a Rayleigh test, we examined whether pfd's of HD neurons were uniformly distributed  
523 (fig. S13) and a V-test (expected  $180^\circ$ ) allowed us to demonstrate that pfd's of GD and steering neurons  
524 were clustered at  $180^\circ$  (Fig. 4G).

525 Statistical tests were always two-sided. Data collection and analysis were not conducted blind to the  
526 conditions of the experiments. For neural recordings, stimulus presentation was pseudorandomized. We  
527 excluded 34 of the 147 recorded neurons, because of the lack of angular tuning when the butterflies  
528 oriented in darkness on a platform prior to flight (Rayleigh test:  $p > 0.05$ ; see also fig. S9).

529

### 530 **Data and codes**

531 Matlab files with the calculated response parameters of the neurons together with the Matlab-scripts  
532 used for the analysis and Arduino scripts used for stimulus presentation are accessible from Datadryad:  
533 <https://tba>

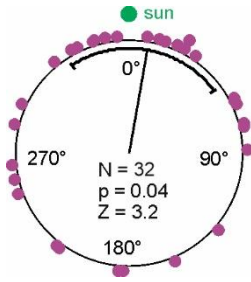

534  
535  
536  
537  
538  
539

**Figure S1. Distribution of preferred headings relative to the virtual sun.** Circularplot visualizing preferred headings of 32 butterflies, sun positioned at 0°. Statistics from a Rayleigh test, testing against a uniform distribution is depicted in the center of the circularplot.

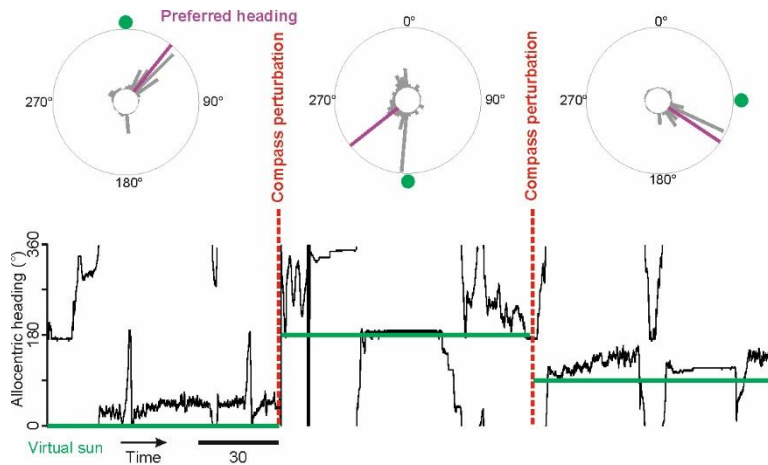

540  
541  
542  
543  
544  
545  
546

**Figure S2. Behavioral performance of a butterfly whose compass polarity was changed by displacing the virtual sun.** Butterfly's heading (*black*) as a function of time. The angular position of the virtual sun is depicted in *green*. Every 90 seconds the virtual sun was displaced (compass perturbation). Circular histograms demonstrate the butterfly's heading at different virtual sun positions. Note that the butterfly changed its preferred heading to set a consistent goal heading relative to the virtual sun.

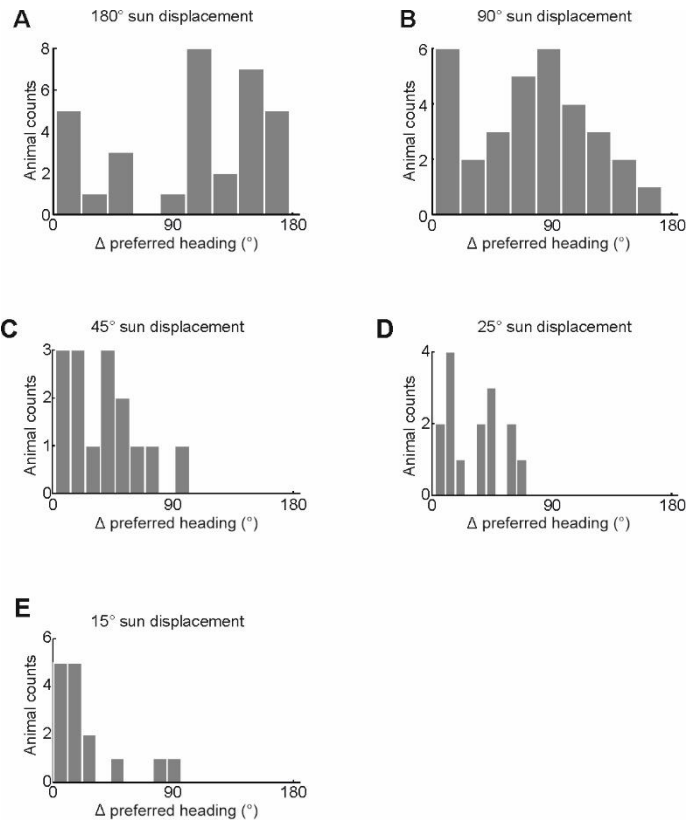

547

548

**Figure S3. Summary of heading changes induced by displacing the virtual sun at different angular positions.**

549

Histograms showing the butterflies' change of heading after 180° (A), 90° (B), 45° (C), 25° (D), and 15° (E) sun displacements.

550

551

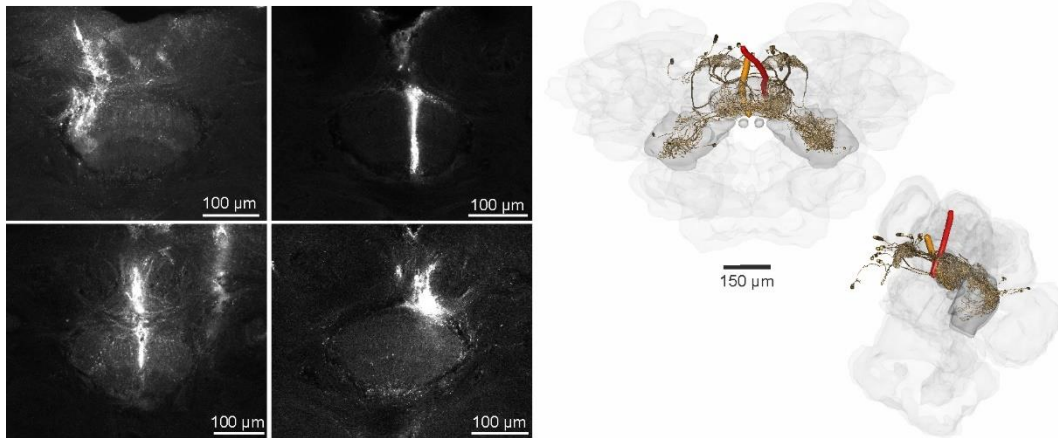

552

553 **Figure S4. Visualization of tetrode positions in the butterfly brain.** *Left:* Z-stacks from the fan-shaped body of the central  
554 complex showing stainings from four example tetrode tracks. *Right:* Anterodorsal (*left*) and lateral (*right*) view of 3D  
555 reconstructed tetrode tracks that correspond to the example neurons presented in Fig.1G and 2F. Prominent central-complex  
556 neurons (*brown*) are visualized.  
557  
558

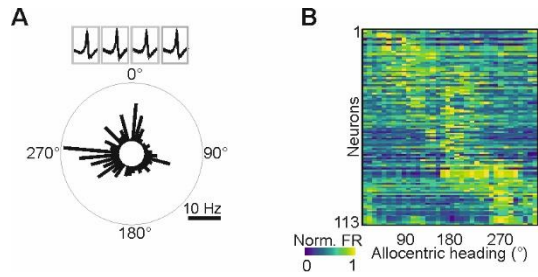

559

560 **Figure S5. Central-complex neurons with an internal representation of directions.** Angular tuning of an example (A)  
561 and 113 (B) neurons measured when the butterfly actively rotated on a platform in darkness. All neurons were spatially tuned  
562 according to a Rayleigh test ( $p < 0.05$ ). Neurons are ordered according to their preferred firing directions.  
563

564

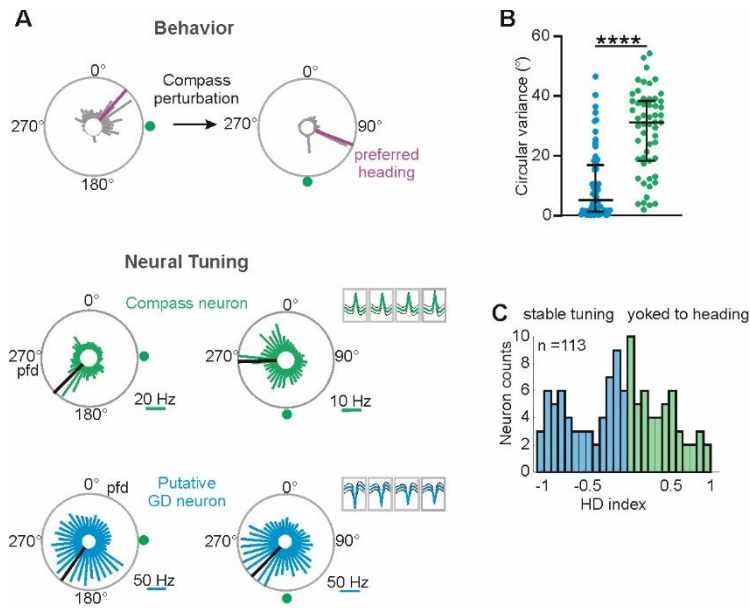

565

566 **Figure S6. Discrimination of compass and putative GD neurons after sun displacements.** (A) Behavioral response  
567 (upper circular plots) and neural tuning of two example neurons (green and blue) in response to a 90° sun displacement.  
568 Respectively, the preferred heading and the preferred firing direction (pfd) is indicated by purple and black bars. The mean  
569 and percentile of the spike wave forms from each tetrode electrode is depicted in the right upper corner of the circular plots.  
570 Note that the angular tuning of the green neuron follows the behavioral response and the pfd changes by about 90° while the  
571 angular tuning of the blue neuron is invariant. (B) Comparison of circular variances of pfd in response to compass  
572 perturbations for putative GD (blue, n = 58) and compass (green, n = 55) neurons. (C) Histogram of measured HD indices.  
573 Indices indicate that the angular tuning is stable (negative) or associated with the butterfly's preferred heading (positive).

574



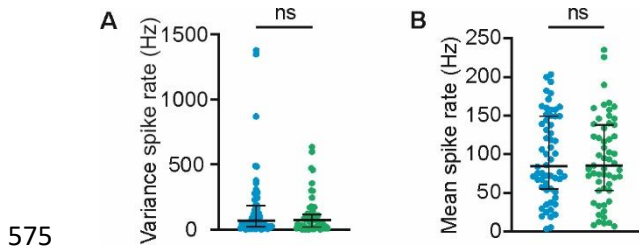

576 **Figure S7. Overview of spike rate parameters for GD (blue) and compass neurons (green) during compass**  
577 **perturbations. (A)** Spike rate variance for GD and compass neurons (Mann Whitney U test, variance:  $p = 0.59$ ,  $U = 1501$ ,  $n =$   
578  $55$  compass neurons;  $n = 58$  GD neurons). **(B)** Mean spike rate for GD and compass neurons (Mann Whitney U test, variance:  
579  $p = 0.75$ ,  $U = 1540$ ,  $n = 55$  compass neurons;  $n = 58$  GD neurons).  
580

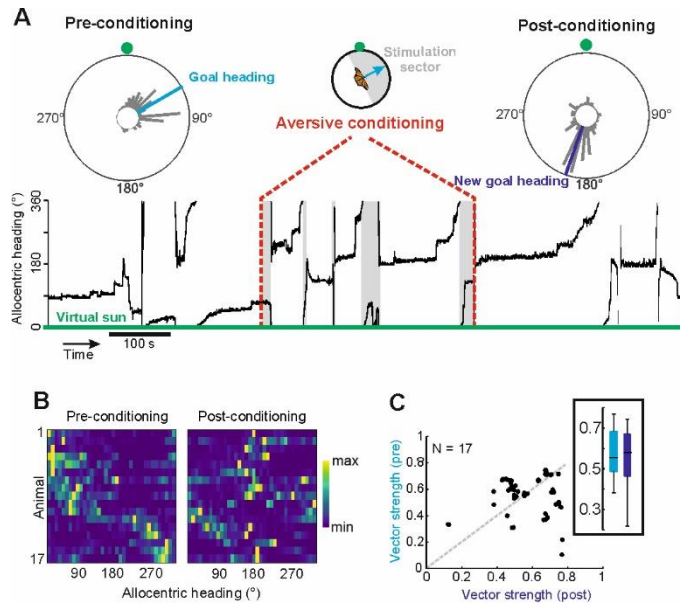

581

582 **Figure S8. Behavioral performance of butterflies in response to aversive conditioning.** (A) Heading plotted as a function  
583 of time. Gray boxes highlight periods of electric shocks. The virtual sun was held in place at 0°. Circular plots summarize the  
584 heading before and after conditioning. (B) Distribution of normalized heading of 17 butterflies before (*left heatmap*) and after  
585 (*right heatmap*) conditioning. Butterflies were ordered according to their initial GD at pre-conditioning. (C) Flight directedness,  
586 represented by the vector strength, was unaffected by conditioning.  
587

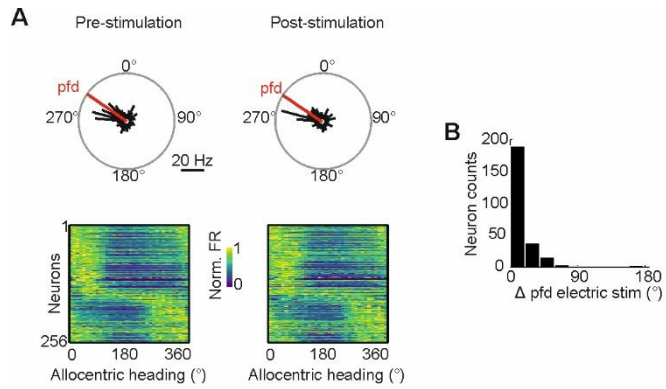

588

589 **Figure S9. Electric stimulation in the central complex does not affect neural tuning.** (A) Upper: Angular tuning of a  
590 central-complex neuron measured with the virtual sun revolving around a restrained butterfly before (Pre-stimulation) and after  
591 (Post-stimulation) electric stimulation. Red line represents the preferred firing direction (pfd). Lower: Angular tuning of 256  
592 central-complex neurons measured before and after electric stimulation. Neurons are ordered according to their pfd. (B) Electric  
593 stimulation in the central complex does not change the neurons' pfd. (Wilcoxon matched-pairs signed rank test,  $p = 0.63$ ,  $W =$   
594 1136,  $n = 256$ ).  
595

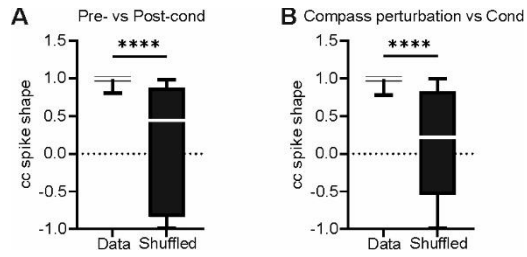

596

597

598

599

600

601

602

**Figure S10. Spike shape stability of neurons recorded during the experiment.** Correlation values of spike shapes measured before and after conditioning (**A**) and during compass perturbation and conditioning (**B**) were compared with correlation of spike shapes shuffled across randomly selected neurons [Wilcoxon matched-pairs signed rank test,  $p < 10^{-5}$ ,  $W = -3395$  (A),  $p < 10^{-5}$ ,  $n = 82$ ;  $W = -10276$ ,  $n = 144$  (B)].

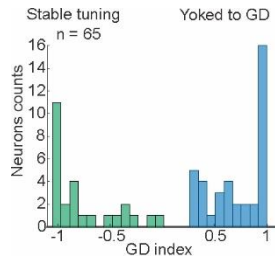

603

604 **Fig. S11. Distribution of goal direction indices from 65 neurons comparing stable tuning against tuning yoked to the**  
605 **goal direction.** Histogram of measured goal direction indices (GD indices). Indices indicate that the angular tuning is stable  
606 (negative) or yoked to the butterfly's goal direction (positive).

607

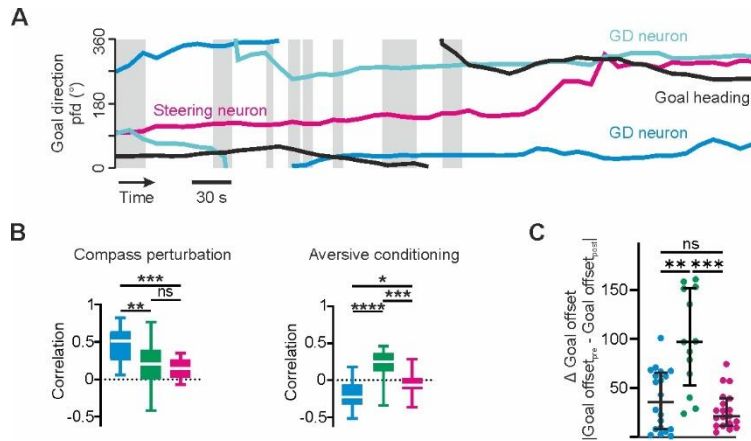

608

609 **Figure S12. Angular tuning changes of GD, HD, and steering neurons in response to aversive conditioning.** (A) Goal  
610 heading (black line) and preferred firing directions (pfd; colored lines) of example neurons (magenta: steering neuron, blue:  
611 GD neurons) plotted as a function of time (Time = 0 start of conditioning). Gray boxes highlight periods of electric stimulation.  
612 (B) Correlation of angular tuning before and after compass perturbations (*left*) or conditioning (*right*). (C) Differences of goal  
613 offsets prior to and after conditioning. The lower the goal offset differences the more was the pfd yoked to the goal direction.  
614 Note that angular tuning of both GD and steering neurons was dependent on the butterfly's goal direction while the angular  
615 tuning of HD neurons was independent from the goal direction.  
616

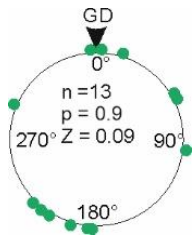

617

618 **Figure S13. Distribution of pfd of HD neurons relative to the butterflies' GDs.**
